# Supplementary material for: The CB1 cannabinoid receptor signals striatal neuroprotection via a PI3K/Akt/mTORC1/BDNF pathway
Source: PubMed Central journal article supplement (PMC4563779; doi:10.1038/cdd.2015.11), 2015-02-20
Supplement: cdd201511x1.pdf [file cdd201511x1.pdf]

| <b>Gene</b>   | <b>Primer (5'-3')</b>     |
|---------------|---------------------------|
| <i>mTrkB</i>  | TGGTGCATTCCATTCACTGT      |
| <i>mGapdh</i> | GGGAAGCTCACTGGCATGGCCTTCC |
| <i>mCarf</i>  | CCATATGACGGAATCCCATT      |
| <i>mCreb1</i> | ACTAGCAGTGGGCAGTACATTG    |
| <i>mNpas4</i> | AGGGTTTGCTGATGAGTTGC      |
| <i>mUsf1</i>  | CCCCCTCACAGAGAGATGAA      |
| <i>mNR1</i>   | GCTTTTGCAGCCGTGAAC        |
| <i>mNR2A</i>  | ATTCAACCAGAGGGGCGTA       |
| <i>mNR2B</i>  | CTTCCTCCTTGCTTTCCACTT     |
| <i>mNR2C</i>  | AGTTCGGGGGACAGACAAG       |
| <i>mNR2D</i>  | TGCGATACAACCAGCCAAG       |
| <i>mActB</i>  | AAGGCCAACCCTGAAAAGAT      |

**Supplementary Table SI. Primers used for quantitative PCR analysis.**
