# Supplementary material for: The CB1 cannabinoid receptor signals striatal neuroprotection via a PI3K/Akt/mTORC1/BDNF pathway
Source: PubMed Central journal article supplement (PMC4563779; doi:10.1038/cdd.2015.11), 2015-02-20
Supplement: cdd201511x2.pdf [file cdd201511x2.pdf]

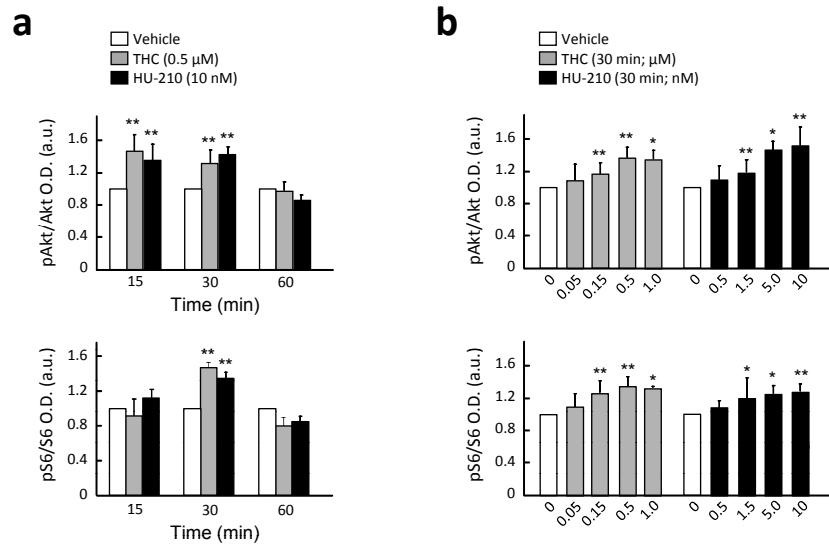

**Supplementary Figure S1. Cannabinoids induce Akt and ribosomal S6 protein phosphorylation in a time- and dose-dependent manner.** STHdh<sup>Q7/Q7</sup> cells were incubated (a) for the times indicated with vehicle, 0.5  $\mu$ M THC or 10 nM HU-210, or (b) for 30 min with vehicle or the doses indicated of THC or HU-210. Cells were lysed and Western blot analyses were conducted. Quantification of mean optical density (O.D.) values relative to those of  $\alpha$ -tubulin are shown (n=3-4 experiments). Data were analyzed using ANOVA with *post hoc* Student-Neuman-Keuls test. \* $P$ <0.05, \*\* $P$ <0.01 from the respective vehicle-treated cells.
