# Supplementary material for: The CB1 cannabinoid receptor signals striatal neuroprotection via a PI3K/Akt/mTORC1/BDNF pathway
Source: PubMed Central journal article supplement (PMC4563779; doi:10.1038/cdd.2015.11), 2015-02-20
Supplement: cdd201511x3.pdf [file cdd201511x3.pdf]

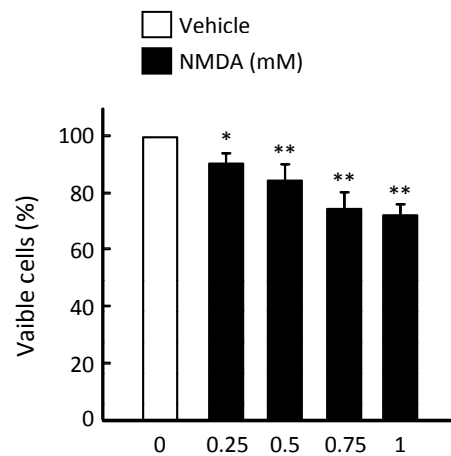

**Supplementary Figure S2. NMDA induces the death of STHdh<sup>Q7/Q7</sup> cells in a dose-dependent manner.** STHdh<sup>Q7/Q7</sup> cells were preincubated for 5 h in Locke's solution with or without the indicated doses of NMDA, and subsequently incubated for 24 h in NMDA-free medium. Relative cell viability is shown (n=4 experiments). Data were analyzed using ANOVA with *post hoc* Student-Neuman-Keuls test. \* $P < 0.05$ , \*\* $P < 0.01$  from vehicle-treated cells.
