# Supplementary material for: The CB1 cannabinoid receptor signals striatal neuroprotection via a PI3K/Akt/mTORC1/BDNF pathway
Source: PubMed Central journal article supplement (PMC4563779; doi:10.1038/cdd.2015.11), 2015-02-20
Supplement: cdd201511x4.pdf [file cdd201511x4.pdf]

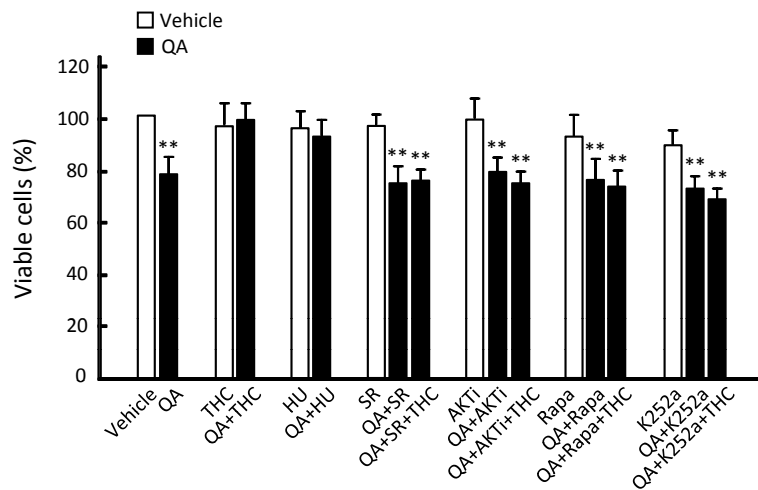

**Supplementary Figure S3. The CB<sub>1</sub> cannabinoid receptor protects cultured striatal cells from quinolinic acid-induced excitotoxicity via PI3K/Akt/mTORC1/BDNF.** STHdh<sup>Q7/Q7</sup> cells were incubated for 24 h with or without 2.5 mM quinolinic acid (QA) together with vehicle, 0.5 μM THC, 10 nM HU-210, 0.25 μM SR141716, 0.1 μM Akti-1/2, 30 nM rapamycin and/or 25 nM K252a. Relative cell viability is shown (n=4-6 experiments). Data were analyzed using ANOVA with *post hoc* Student-Neuman-Keuls test. \*\**P*<0.01 from vehicle-treated cells.
