# Supplementary material for: The CB1 cannabinoid receptor signals striatal neuroprotection via a PI3K/Akt/mTORC1/BDNF pathway
Source: PubMed Central journal article supplement (PMC4563779; doi:10.1038/cdd.2015.11), 2015-02-20
Supplement: cdd201511x5.pdf [file cdd201511x5.pdf]

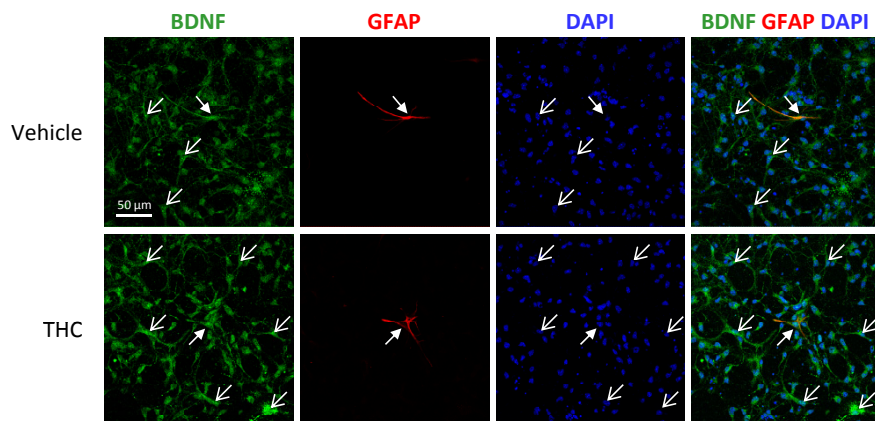

**Supplementary Figure S4. Primary cultures of mouse striatal neurons contain very few BDNF/GFAP-double-positive cells.** Cultures of primary mouse striatal neurons were incubated for 24 h with vehicle or 0.3  $\mu$ M THC. Samples were fixed, and BDNF and GFAP immunoreactivities were analyzed. Representative images are shown (n=3 cultures). Close arrows point to BDNF<sup>+</sup>/GFAP<sup>+</sup> cells, and open arrows point to a selection of BDNF<sup>+</sup>/GFAP<sup>-</sup> cells. Note the marginal occurrence of BDNF<sup>+</sup>/GFAP<sup>+</sup> cells.
