# Supplementary material for: The CB1 cannabinoid receptor signals striatal neuroprotection via a PI3K/Akt/mTORC1/BDNF pathway
Source: PubMed Central journal article supplement (PMC4563779; doi:10.1038/cdd.2015.11), 2015-02-20
Supplement: cdd201511x6.pdf [file cdd201511x6.pdf]

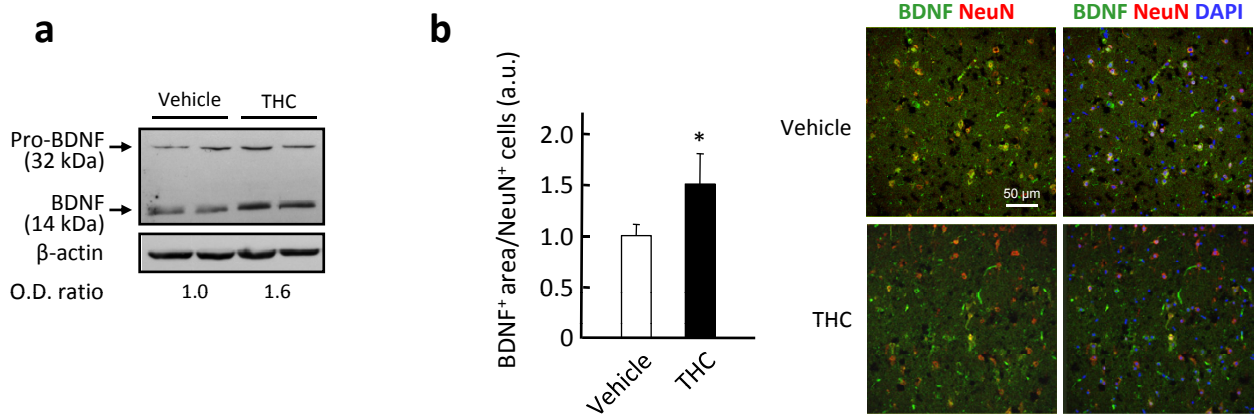

**Supplementary Figure S5. THC induces BDNF expression in mouse corticostriatal slices.** Mouse corticostriatal organotypic cultures were incubated for 24 h with vehicle or 0.5  $\mu$ M THC, and BDNF expression was determined in the striatum by Western blot and immunofluorescence analyses. **(a)** A representative blot is shown [ $n=3$  experiments; mean optical density (O.D.) values relative to those of  $\beta$ -actin are given]. **(b)** A representative immunostaining is shown, together with the quantification of the relative values of BDNF-positive area/NeuN-positive cells ( $n=3$  experiments). Data were analyzed using unpaired Student's  $t$  test. \* $P<0.05$  from vehicle-treated slices.
