# Supplementary material for: The CB1 cannabinoid receptor signals striatal neuroprotection via a PI3K/Akt/mTORC1/BDNF pathway
Source: PubMed Central journal article supplement (PMC4563779; doi:10.1038/cdd.2015.11), 2015-02-20
Supplement: cdd201511x7.pdf [file cdd201511x7.pdf]

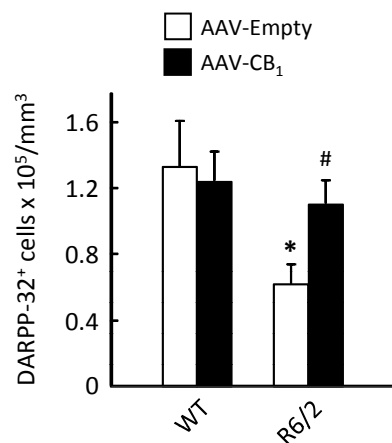

**Supplementary Figure S6. Enforced re-expression of the CB<sub>1</sub> receptor normalizes DARPP-32 expression in the striata of R6/2 mice.** R6/2 mice (3.5-4 week-old) and WT littermates were injected stereotactically into the dorsolateral striatum with a recombinant adeno-associated virus (AAV) encoding HA-tagged CB<sub>1</sub> receptor or the empty vector as control (n=4-5 animals per group). At week 8 of age animals were sacrificed for stereological counting of DARPP-32-positive cells in the infected region. Data were analyzed using unpaired Student's *t* test. \**P*<0.05 from the WT-Empty group; #*P*<0.05 from the R6/2-Empty group.
