# Supplementary material for: The CB1 cannabinoid receptor signals striatal neuroprotection via a PI3K/Akt/mTORC1/BDNF pathway
Source: PubMed Central journal article supplement (PMC4563779; doi:10.1038/cdd.2015.11), 2015-02-20
Supplement: cdd201511x8.pdf [file cdd201511x8.pdf]

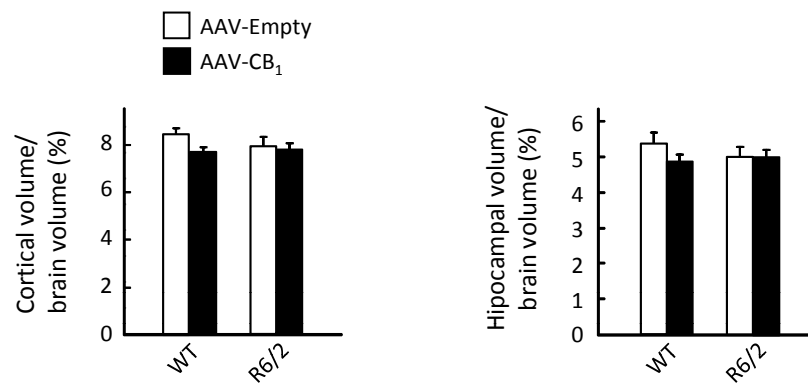

**Supplementary Figure S7. Cortical and hippocampal volume does not change in 8 week-old R6/2 mice.** R6/2 mice (3.5-4 week-old) and WT littermates were injected stereotactically into the dorsolateral striatum with a recombinant adeno-associated virus (AAV) encoding HA-tagged CB<sub>1</sub> receptor or empty vector as control (n=10-12 animals per group). The volume of the cortex (somatosensory and motor areas) and the hippocampus relative to total brain volume of 8 week-old animals is represented. Data were analyzed using unpaired Student's *t* test.
