# Supplementary material for: The CB1 cannabinoid receptor signals striatal neuroprotection via a PI3K/Akt/mTORC1/BDNF pathway
Source: PubMed Central journal article supplement (PMC4563779; doi:10.1038/cdd.2015.11), 2015-02-20
Supplement: cdd201511x9.pdf [file cdd201511x9.pdf]

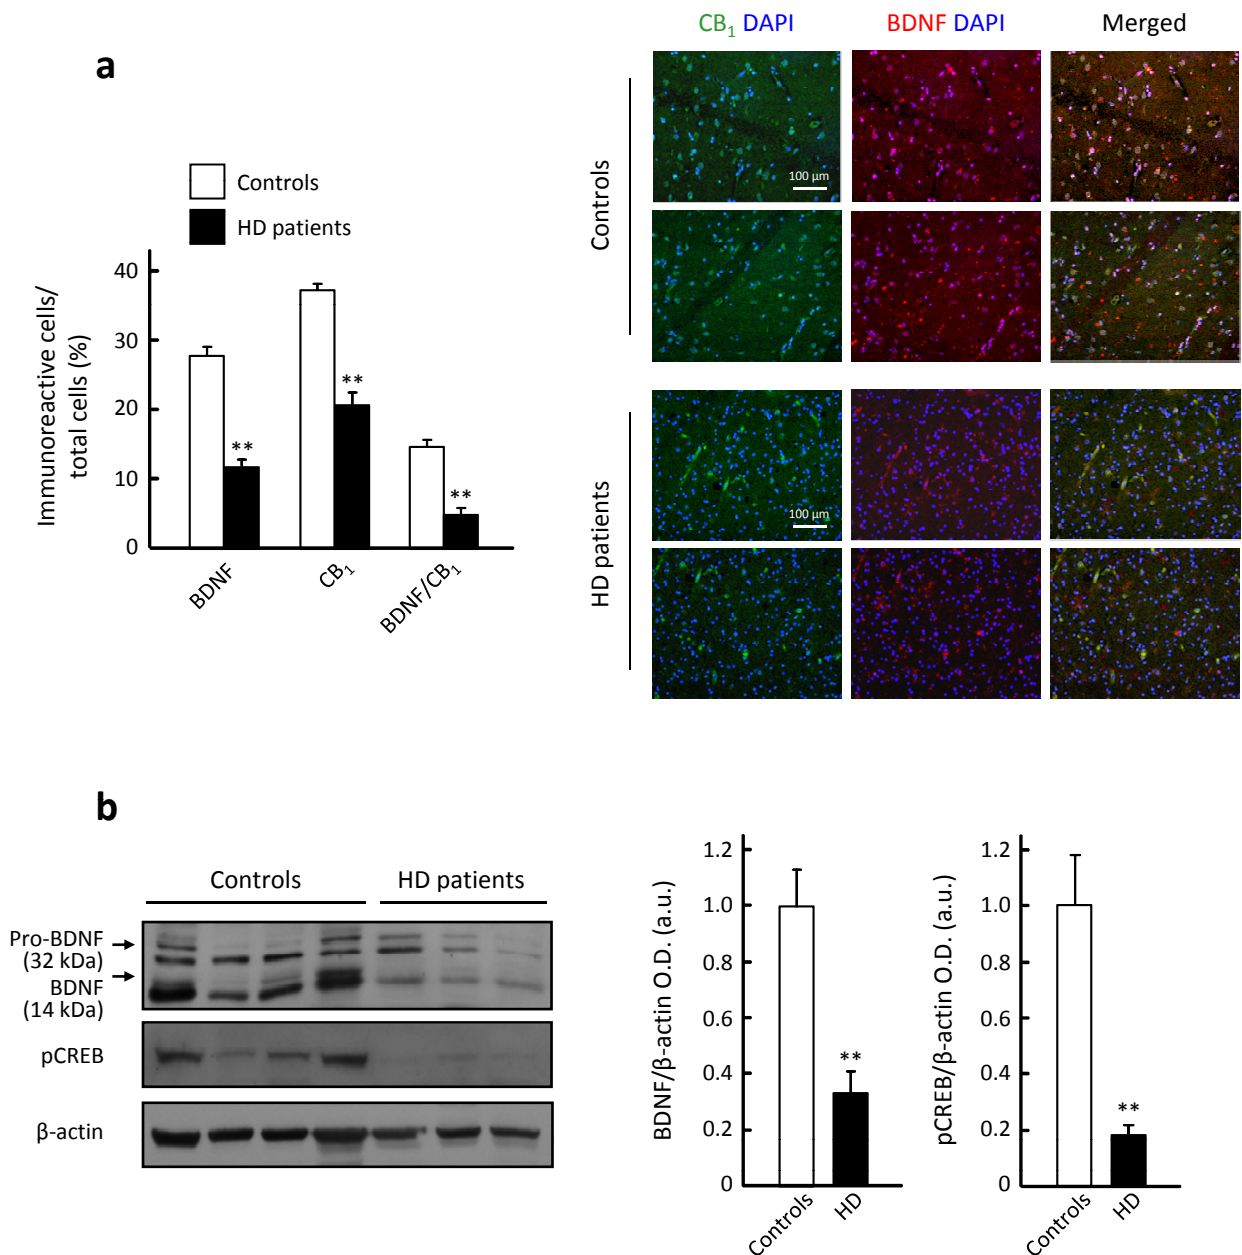

**Supplementary Figure S8. The CB<sub>1</sub> receptor and BDNF are down-regulated in *post-mortem* caudate-putamen specimens of HD patients.** (a) Quantification by immunofluorescence analysis of CB<sub>1</sub>/BDNF expression in control subjects (n=7) and HD patients (grades 3-4; n=9). Representative images of CB<sub>1</sub> receptor and BDNF immunostaining in 2 control subjects and 2 HD patients are shown. (b) Western blot analysis of BDNF and pCREB expression in control subjects (n=5) and HD patients (grades 3-4; n=4). Quantification of mean ± SEM optical density (O.D.) values relative to those of β-actin as well as representative blots of 4 control subjects and 3 HD patients are shown. Data were analyzed using unpaired Student's *t* test. \*\**P*<0.01 from the corresponding control group.
